# Supplementary material
Source: publisher figshare collection journal article supplement (https://asha.figshare.com/articles/dataset/_/14810523)
Supplement: Supplementary file 1 [file 1]

**Supplemental Material S3.** Full LMER summary table, reporting the reference level of the factors block and Condition, the model estimate, standard error of the estimate, degrees of freedom for the fixed factor, and the *t*- and *p*-values.

| Fixed Effect      | Cond Ref. = AV Full |         |           |          |          |                   | Cond Ref. = AV Mouth |          |           |          |          |                   |
|-------------------|---------------------|---------|-----------|----------|----------|-------------------|----------------------|----------|-----------|----------|----------|-------------------|
|                   | Block Ref.          | Est.    | Std. Err. | df       | <i>t</i> | Pr(>  <i>t</i>  ) | Block Ref.           | Est.     | Std. Err. | df       | <i>t</i> | Pr(>  <i>t</i>  ) |
| Intercept†        | 1                   | 35.516  | 2.3434    | 263.771  | 14.302   | < .0001***        | 1                    | 33.354   | 2.343     | 263.727  | 14.234   | < .0001***        |
| AV Mouth          | 1                   | -0.162  | 2.821     | 216.869  | -0.057   | 0.954             |                      |          |           |          |          |                   |
| AV Block          | 1                   | -29.376 | 2.820     | 216.787  | -10.416  | < .0001***        | 1                    | -29.215  | 2.820     | 263.790  | -10.358  | < .0001***        |
| AV Still          | 1                   | -30.164 | 2.821     | 216.857  | -10.694  | < .0001***        | 1                    | -30.002  | 2.820     | 216.752  | -10.638  | < .0001***        |
| AV Eyes           | 1                   | -29.506 | 2.820     | 216.701  | -10.463  | < .0001***        | 1                    | -29.3442 | 2.820     | 216.651  | -10.406  | < .0001***        |
| Block 2†          | 1                   | 9.431   | 1.391     | 8779.315 | 6.783    | < .0001***        | 1                    | 11.011   | 1.390     | 8779.088 | 7.920    | < .0001***        |
| Block 3†          | 2                   | 2.344   | 1.390     | 8778.881 | 1.686    | .092              | 2                    | 2.888    | 1.390     | 8779.057 | 2.077    | .038*             |
| Block 4†          | 3                   | 5.233   | 1.390     | 8779.095 | 3.764    | .0002**           | 3                    | 2.999    | 1.390     | 8779.290 | 2.157    | .031*             |
| AV Mouth: Block 2 | 1                   | 1.579   | 1.967     | 8779.877 | 0.803    | .422              |                      |          |           |          |          |                   |
| AV Mouth: Block 3 | 2                   | 0.544   | 1.967     | 8779.588 | 0.276    | .782              |                      |          |           |          |          |                   |
| AV Mouth: Block 4 | 3                   | -2.235  | 1.967     | 8779.599 | -1.136   | .256              |                      |          |           |          |          |                   |
| AV Block: Block 2 | 1                   | -8.080  | 1.965     | 8778.647 | -4.112   | < .0001***        | 1                    | -9.660   | 1.966     | 8779.217 | -4.913   | < .0001***        |
| AV Block: Block 3 | 2                   | -1.819  | 1.967     | 8779.588 | -0.925   | 0.355             | 2                    | -2.363   | 1.967     | 8779.666 | -1.201   | .230              |
| AV Block: Block 4 | 3                   | -5.560  | 1.967     | 8779.860 | -2.826   | 0.005**           | 3                    | -3.326   | 1.967     | 8779.779 | -1.691   | 0.091             |
| AV Still: Block 2 | 1                   | -9.277  | 1.967     | 8779.479 | -4.717   | < .0001***        | 1                    | -10.856  | 1.965     | 8778.759 | -5.524   | < .0001***        |
| AV Still: Block 3 | 2                   | -1.141  | 1.967     | 8779.348 | -0.580   | 0.562             | 2                    | -1.1684  | 1.967     | 8779.527 | -0.856   | .392              |
| AV Still: Block 4 | 3                   | -6.067  | 1.967     | 8779.353 | -3.085   | 0.002**           | 3                    | -3.833   | 1.966     | 8779.158 | -1.949   | .051              |
| AV Eyes: Block 2  | 1                   | -7.726  | 1.968     | 8780.009 | -3.927   | < .0001***        | 1                    | -9.306   | 1.965     | 8778.746 | -4.735   | < .0001***        |

|                                                                                                                    |   |        |       |          |        |       |   |        |       |          |        |      |
|--------------------------------------------------------------------------------------------------------------------|---|--------|-------|----------|--------|-------|---|--------|-------|----------|--------|------|
| AV Eyes: Block 3                                                                                                   | 2 | -2.776 | 1.967 | 8779.536 | -1.411 | 0.158 | 2 | -3.319 | 1.966 | 8778.848 | -1.689 | .091 |
| AV Eyes: Block 4                                                                                                   | 3 | -3.579 | 1.967 | 8779.429 | -1.820 | 0.069 | 3 | -1.345 | 1.966 | 8778.100 | -0.684 | .494 |
| Model syntax: lmer(accuracy ~ (1   participant2:condition) + (1   sentence) + condition + block + condition:block) |   |        |       |          |        |       |   |        |       |          |        |      |

| Fixed Effect                                                                                                       | Cond Ref. = AV Block |        |           |          |        |          | Cond Ref. = AV Still |        |           |          |        |          |
|--------------------------------------------------------------------------------------------------------------------|----------------------|--------|-----------|----------|--------|----------|----------------------|--------|-----------|----------|--------|----------|
|                                                                                                                    | Block Ref.           | Est.   | Std. Err. | df       | t      | Pr(> t ) | Block Ref.           | Est.   | Std. Err. | df       | t      | Pr(> t ) |
| Intercept†                                                                                                         | 1                    | 4.138  | 2.343     | 263.753  | 1.767  | .079     | 1                    | 3.534  | 2.343     | 263.976  | 1.431  | .154     |
| AV Still                                                                                                           | 1                    | -0.787 | 2.821     | 216.901  | -0.279 | .780     |                      |        |           |          |        |          |
| AV Eyes                                                                                                            | 1                    | -0.130 | 2.820     | 216.748  | -0.046 | .963     | 1                    | 0.657  | 2.820     | 216.730  | 0.233  | .816     |
| Block 2                                                                                                            | 1                    | 1.875  | 1.392     | 8780.775 | 1.347  | .178     | 1                    | 1.357  | 1.391     | 8779.902 | 0.976  | .329     |
| Block 3                                                                                                            | 2                    | 0.525  | 1.392     | 8780.413 | 0.377  | .706     | 2                    | 1.203  | 1.391     | 8779.409 | 0.865  | .389     |
| Block 4                                                                                                            | 3                    | -0.327 | 1.392     | 8780.803 | -0.235 | .814     | 3                    | -0.834 | 1.390     | 8779.124 | -0.600 | .548     |
| AV Still: Block 2                                                                                                  | 1                    | 0.354  | 1.967     | 8779.591 | 0.180  | .857     |                      |        |           |          |        |          |
| AV Still: Block 3                                                                                                  | 2                    | -0.946 | 1.967     | 8780.144 | -0.486 | .627     |                      |        |           |          |        |          |
| AV Still: Block 4                                                                                                  | 3                    | 1.981  | 1.967     | 8779.832 | 1.007  | .314     |                      |        |           |          |        |          |
| AV Eyes: Block 2                                                                                                   | 1                    | -1.197 | 1.968     | 8780.169 | -0.608 | .543     | 1                    | 1.550  | 1.967     | 8779.607 | 0.788  | .431     |
| AV Eyes: Block 3                                                                                                   | 2                    | 0.679  | 1.966     | 8779.266 | 0.345  | .730     | 2                    | -1.635 | 1.968     | 8780.112 | -0.831 | .406     |
| AV Eyes: Block 4                                                                                                   | 3                    | -0.507 | 1.967     | 8779.665 | -0.258 | .797     | 3                    | 2.488  | 1.965     | 8778.509 | 1.266  | .205     |
| Model syntax: lmer(accuracy ~ (1   participant2:condition) + (1   sentence) + condition + block + condition:block) |                      |        |           |          |        |          |                      |        |           |          |        |          |

† The model intercept, reflects differences from 0 at for the reference of the Condition factor at Block 1.

†† Indicates the difference between sequential blocks for the Condition reference, e.g., if Condition reference = AV Full, block 2 indicates the difference in accuracy for block 2 relative to block 1 for AV Full.

\* Indicates an effect is significant at the .05 level.

\*\*\* Indicates an effect is significant at the .0001 level.
