# Supplementary material
Source: publisher figshare collection journal article supplement (https://asha.figshare.com/articles/dataset/_/14810523)
Supplement: Supplementary file 3 [file 1]

**Supplemental Material S4.** Full LMER summary table, reporting the reference level of the factors trial and Condition, the model estimate, standard error of the estimate, degrees of freedom for the fixed factor, and the *t*- and *p*-values.

| Fixed Effect                                                                                                                            | Cond Ref. = AV Full |           |          |          |                   | Cond Ref. = AV Mouth |           |          |          |                   |
|-----------------------------------------------------------------------------------------------------------------------------------------|---------------------|-----------|----------|----------|-------------------|----------------------|-----------|----------|----------|-------------------|
|                                                                                                                                         | Est.                | Std. Err. | df       | <i>t</i> | Pr(>  <i>t</i>  ) | Est.                 | Std. Err. | df       | <i>t</i> | Pr(>  <i>t</i>  ) |
| Intercept†                                                                                                                              | 43.069              | 2.182     | 198.802  | 19.739   | < .0001***        | 43.806               | 2.182     | 198.802  | 20.077   | < .0001***        |
| AV Mouth                                                                                                                                | 0.7361              | 2.550     | 145      | 0.289    | .773              |                      |           |          |          |                   |
| AV Block                                                                                                                                | -37.736             | 2.550     | 145      | -14.797  | < .0001***        | -38.472              | 2.550     | 145.000  | -15.086  | < .0001***        |
| AV Still                                                                                                                                | -39.208             | 2.550     | 145      | -15.375  | < .0001***        | -39.944              | 2.550     | 145.000  | -15.663  | < .0001***        |
| AV Eyes                                                                                                                                 | -37.583             | 2.550     | 145      | -14.737  | < .0001***        | -38.319              | 2.550     | 145.00   | -15.026  | < .0001***        |
| Trial – Linear††                                                                                                                        | 589.533             | 46.570    | 8784.913 | 12.659   | < .0001***        | 589.026              | 46.537    | 8784.145 | 12.657   | < .0001***        |
| Trial – Quad.††                                                                                                                         | -142.327            | 46.524    | 8783.838 | -3.059   | .002**            | -237.660             | 46.560    | 8784.661 | -5.104   | < .0001***        |
| AV Mouth: Trial – Linear                                                                                                                | -0.507              | 65.859    | 8784.889 | -0.008   | .994              |                      |           |          |          |                   |
| AV Block: Trial – Linear                                                                                                                | -548.703            | 65.909    | 8785.711 | -8.325   | < .0001***        | -548.196             | 65.815    | 8784.162 | -8.329   | < .0001***        |
| AV Still: Trial – Linear                                                                                                                | -558.650            | 65.923    | 8785.944 | -8.474   | < .0001***        | -558.143             | 65.862    | 8784.938 | -8.474   | < .0001***        |
| AV Eyes: Trial – Linear                                                                                                                 | -492.163            | 65.780    | 8783.585 | -7.482   | < .0001***        | -491.656             | 65.828    | 8784.381 | -7.469   | < .0001***        |
| AV Mouth: Trial – Quad                                                                                                                  | -95.333             | 65.859    | 8784.883 | -1.448   | .148              |                      |           |          |          |                   |
| AV Blocked: Trial – Quad                                                                                                                | 73.695              | 65.795    | 8783.830 | 1.120    | .263              | 169.028              | 65.861    | 8784.925 | 2.566    | .010*             |
| AV Still: Trial – Quad                                                                                                                  | 95.749              | 65.819    | 8784.223 | 1.455    | .146              | 191.082              | 65.847    | 8784.693 | 2.902    | .004*             |
| AV Eyes: Trial - Quad                                                                                                                   | 144.488             | 65.896    | 8785.499 | 2.193    | .028*             | 239.821              | 65.868    | 8785.039 | 3.641    | .0002***          |
| Model Syntax: lmer(accuracy ~ Condition + poly(trial, 2) + (1   participant : Condition) + (1   sentence) + Condition : poly(trial, 2)) |                     |           |          |          |                   |                      |           |          |          |                   |

| Fixed Effect                                                                                                                            | Cond Ref. = AV Block |           |          |        |          | Cond Ref. = AV Still |           |          |        |          |
|-----------------------------------------------------------------------------------------------------------------------------------------|----------------------|-----------|----------|--------|----------|----------------------|-----------|----------|--------|----------|
|                                                                                                                                         | Est.                 | Std. Err. | df       | t      | Pr(> t ) | Est.                 | Std. Err. | df       | t      | Pr(> t ) |
| Intercept                                                                                                                               | 5.333                | 2.182     | 198.802  | 2.444  | .015*    | 3.861                | 2.182     | 198.801  | 1.770  | .078     |
| AV Still                                                                                                                                | -1.472               | 2.550     | 145.000  | -0.577 | .565     |                      |           |          |        |          |
| AV Eyes                                                                                                                                 | 0.153                | 2.550     | 145.000  | 0.060  | .952     | 1.625                | 2.550     | 145.000  | 0.637  | .525     |
| Trial – Linear                                                                                                                          | 40.830               | 46.590    | 8785.373 | 0.876  | .381     | 30.883               | 46.594    | 8785.452 | 0.663  | .507     |
| Trial – Quad.                                                                                                                           | -68.632              | 46.565    | 8784.782 | -1.474 | .141     | -46.578              | 46.594    | 8784.452 | -1.001 | .317     |
| AV Still: Trial – Linear                                                                                                                | -9.947               | 65.899    | 8785.551 | -0.151 | .880     |                      |           |          |        |          |
| AV Eyes: Trial – Linear                                                                                                                 | 56.540               | 65.854    | 8784.808 | 0.859  | .391     | 66.487               | 65.841    | 8784.594 | 1.010  | .313     |
| AV Still: Trial – Quad                                                                                                                  | 22.054               | 65.854    | 8784.803 | 0.335  | .737     |                      |           |          |        |          |
| AV Eyes: Trial - Quad                                                                                                                   | 70.793               | 65.893    | 8785.460 | 1.074  | .283     | 48.739               | 65.843    | 8784.620 | 0.740  | 0.146    |
| Model Syntax: lmer(accuracy ~ Condition + poly(trial, 2) + (1   participant : Condition) + (1   sentence) + Condition : poly(trial, 2)) |                      |           |          |        |          |                      |           |          |        |          |

† Intercept value reflect mean performance across all trials, with a significant effect indicating that the mean differs from 0.

†† Reflects the interaction between linear or quadratic effects and the Condition reference.

\* Significant at the .05 level.

\*\*\* Significant at the .0001 level.
